# Supplementary material for: The linear ubiquitin chain assembly complex (LUBAC) generates heterotypic ubiquitin chains
Source: eLife. 2021 Jun 18;10:e60660. doi: 10.7554/eLife.60660 (PMC8245127; doi:10.7554/eLife.60660)
Supplement: Supplementary file 1. [file elife-60660-supp1.xlsx]

## Sheet: Sheet1
	Supplementary Table 1: Population masses determined by mass photometry
		Mass in kDa
	Peak	Measurement 1	Measurement 2	Measurement 3	Weighted average
	I	67 ±7.5	115 ±9.5	101 ±17.0	73.5 ±13.0
	II	230 ±7.5	230 ±8.0	231 ±10.0	231 ±12.0
	III	458 ±20.0	457 ±17.0	454 ±22.0	454 ±22.0
