# Supplementary figures and images for: The linear ubiquitin chain assembly complex (LUBAC) generates heterotypic ubiquitin chains
Source: eLife journal article supplement (doi:10.7554/elife.60660), 2021-06-18

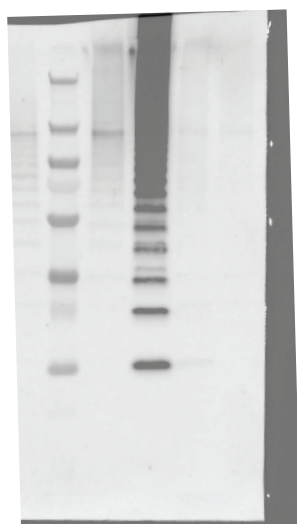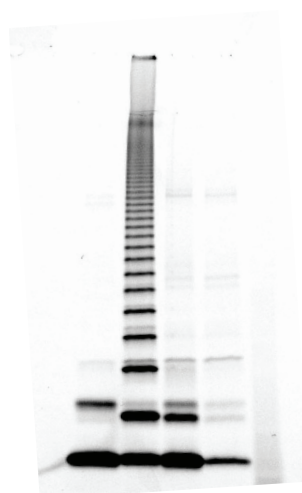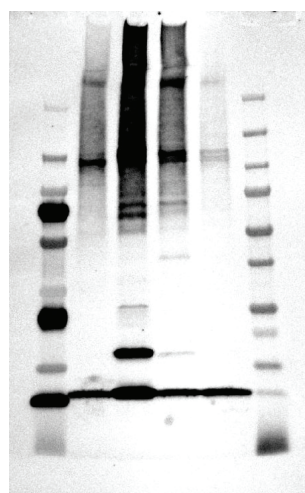

Supplement: supp [file elife-60660-supp-v1.zip]

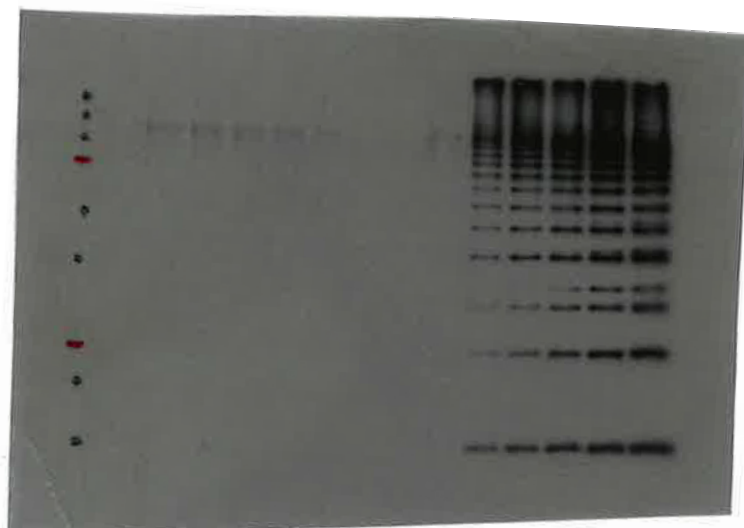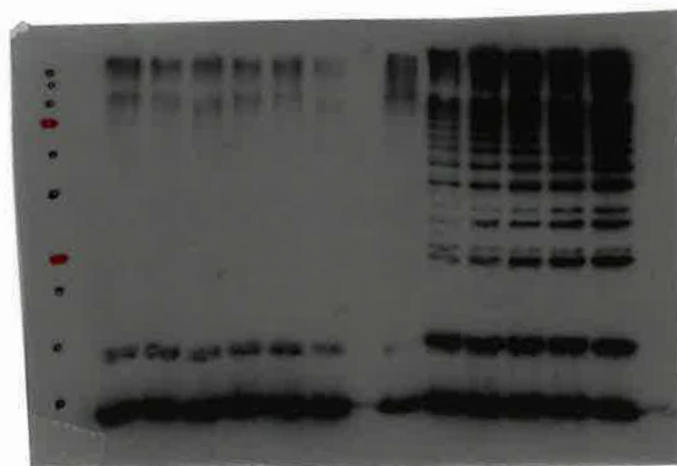

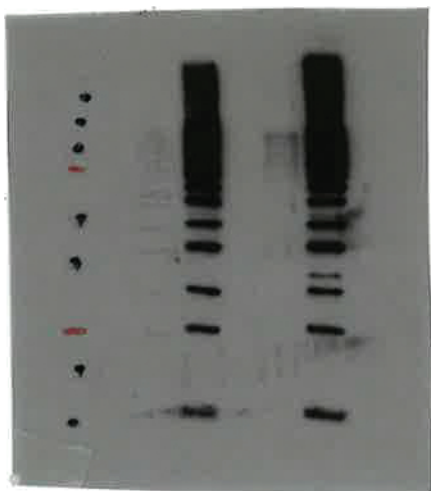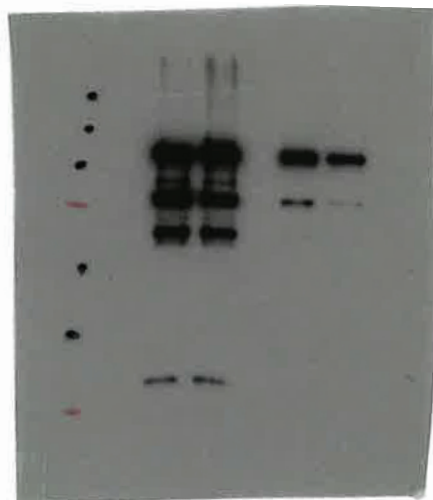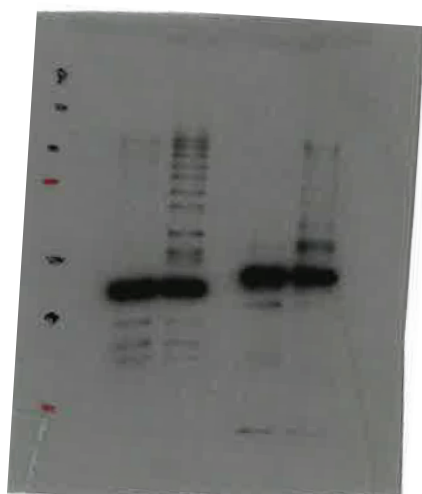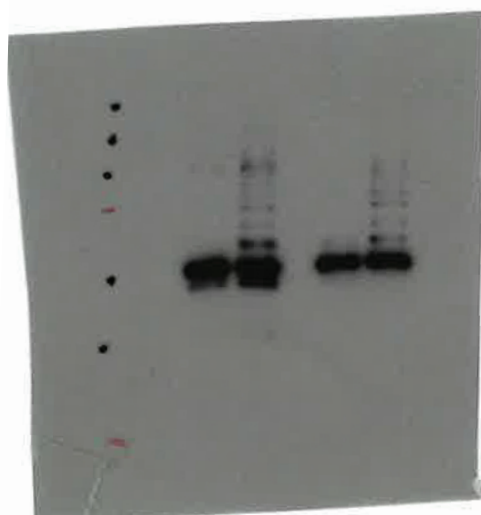

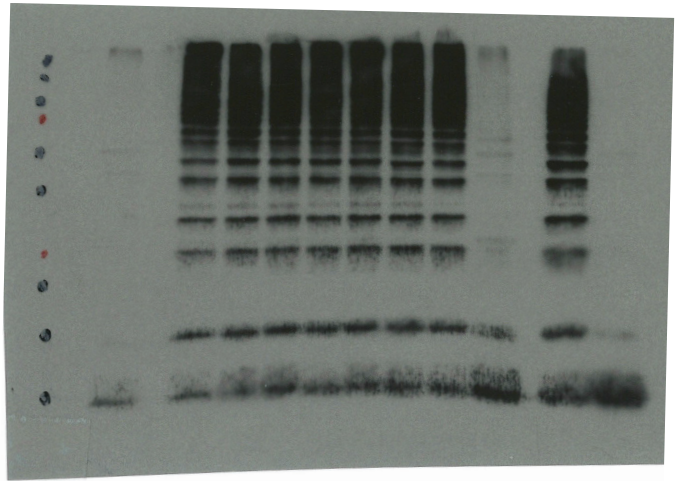

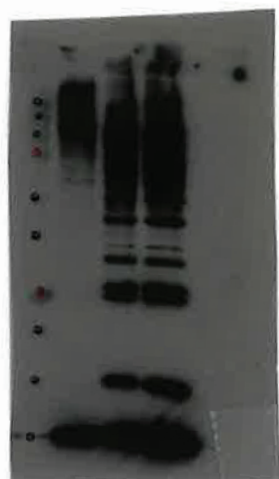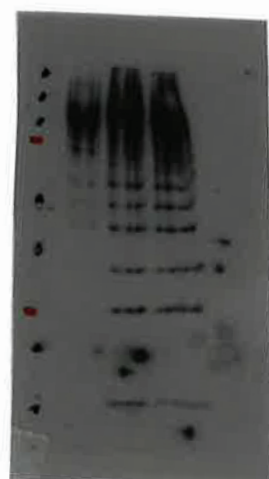



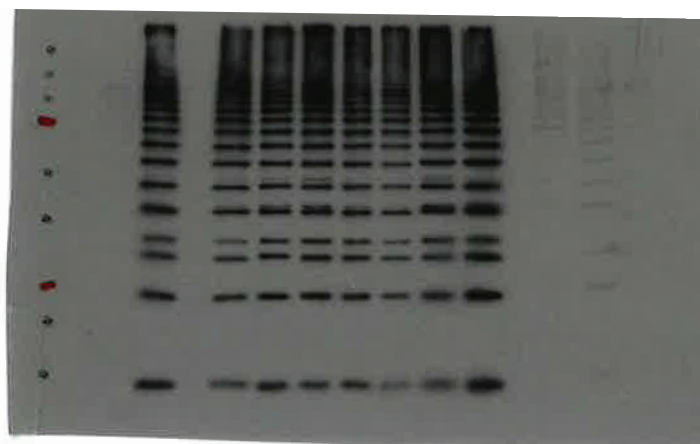

Supplement: supp [file elife-60660-supp-v1.zip]

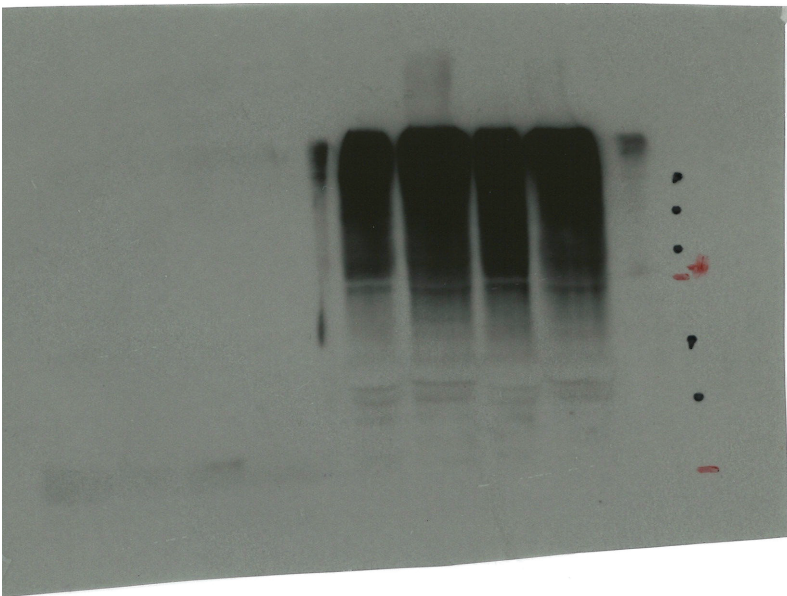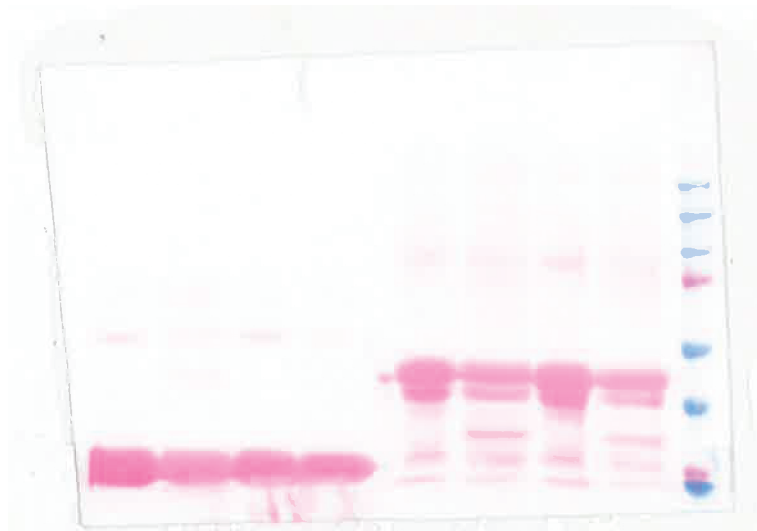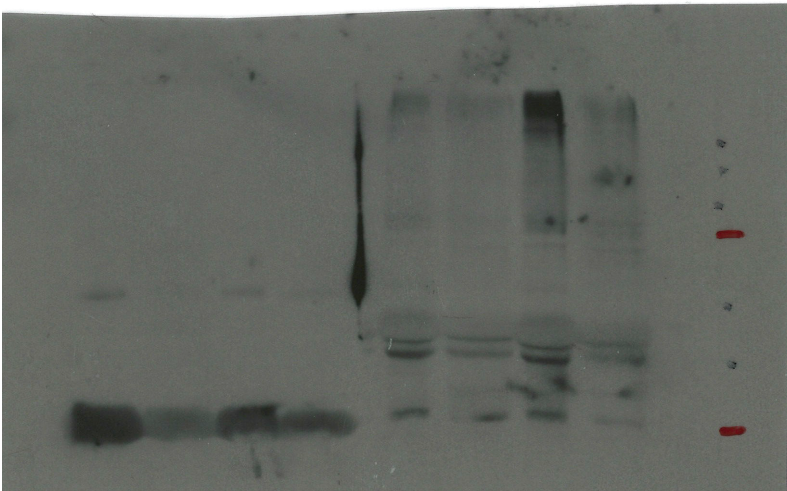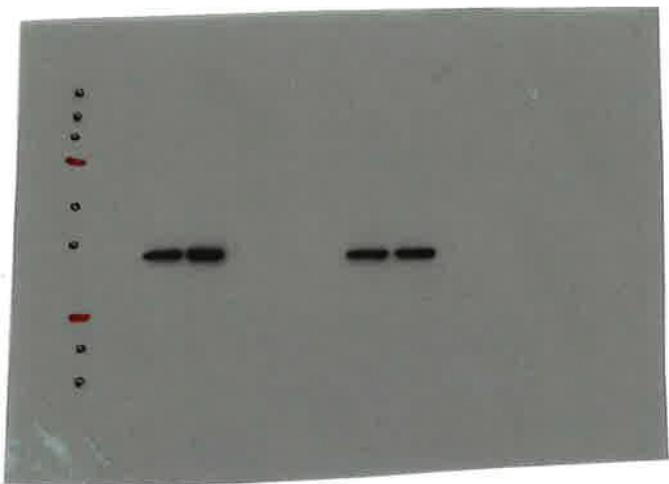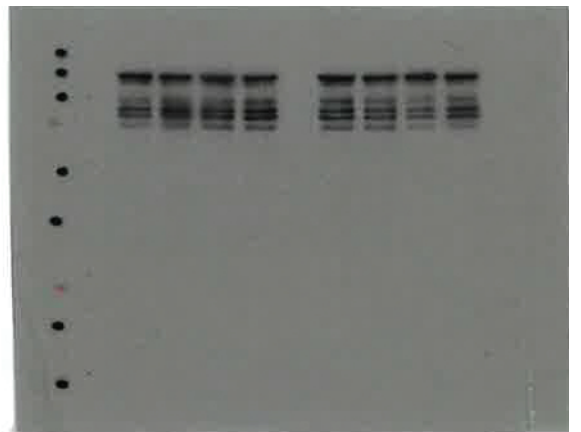

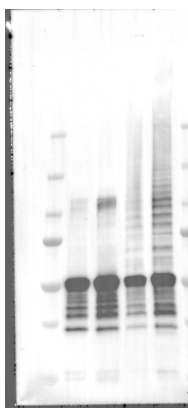

Supplement: supp [file elife-60660-supp-v1.zip]

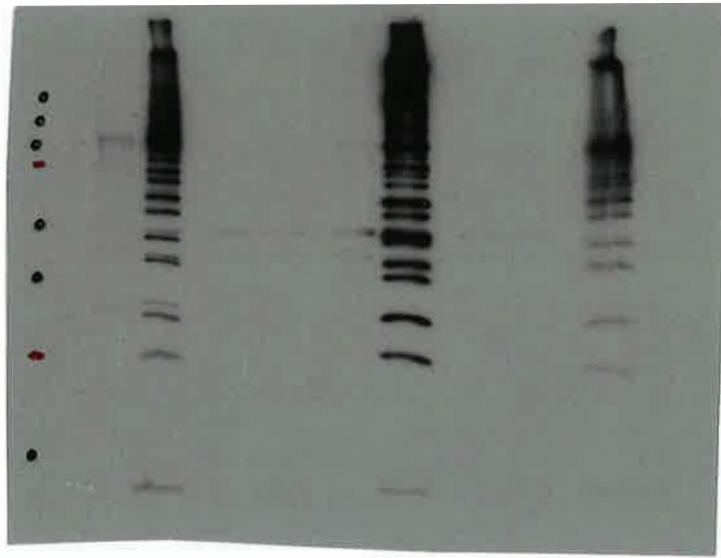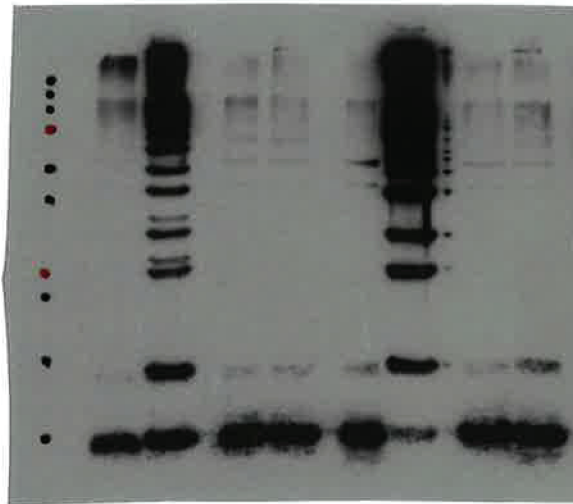

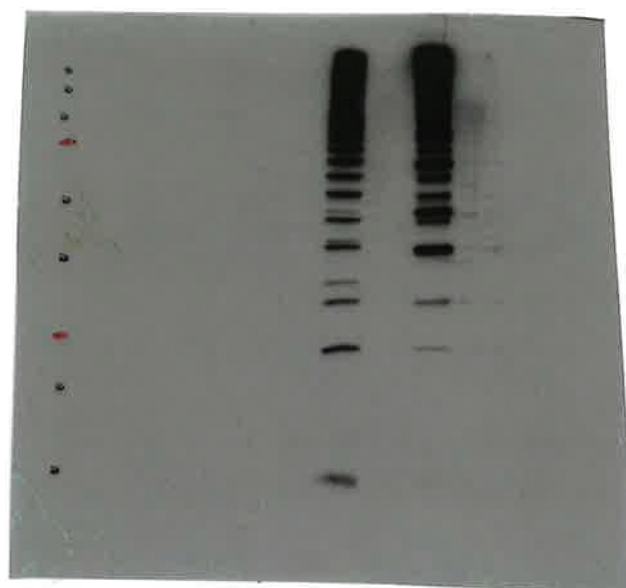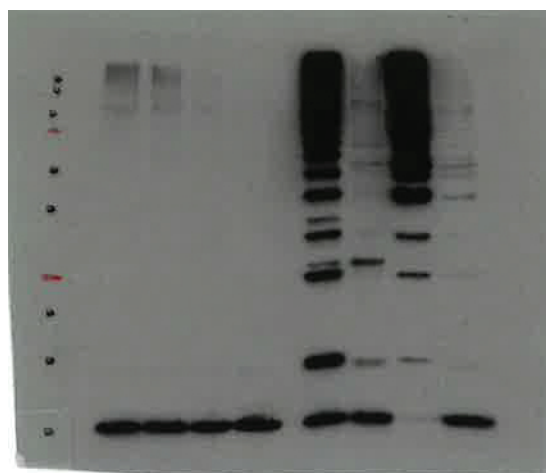

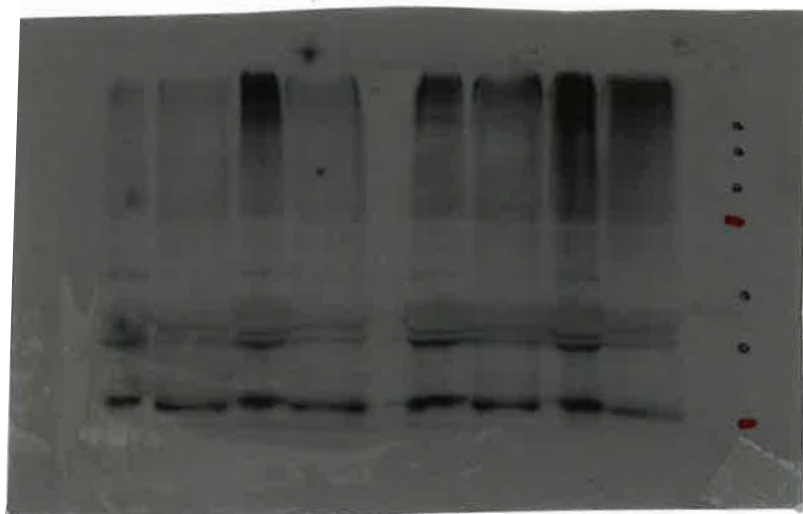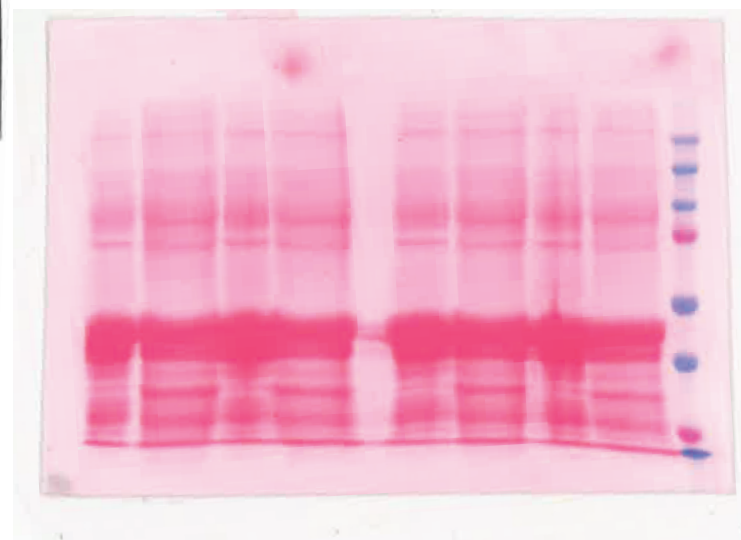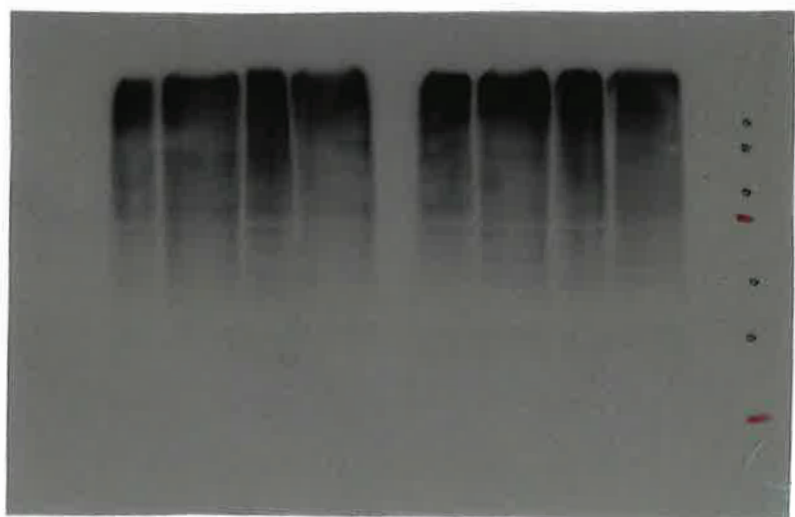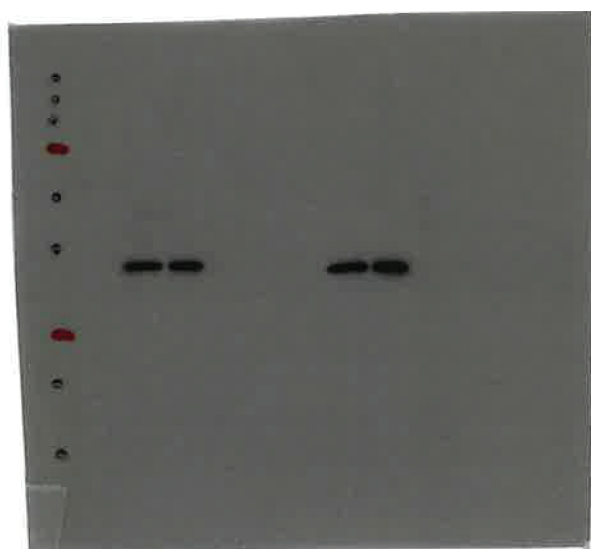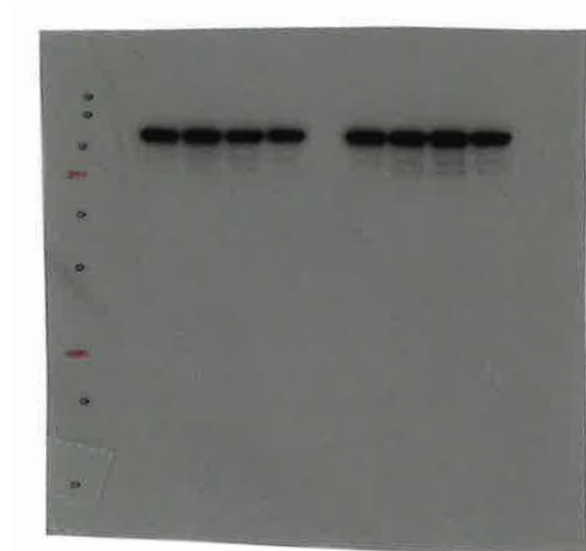

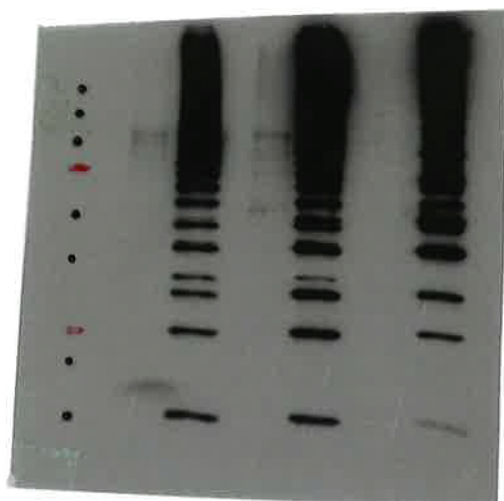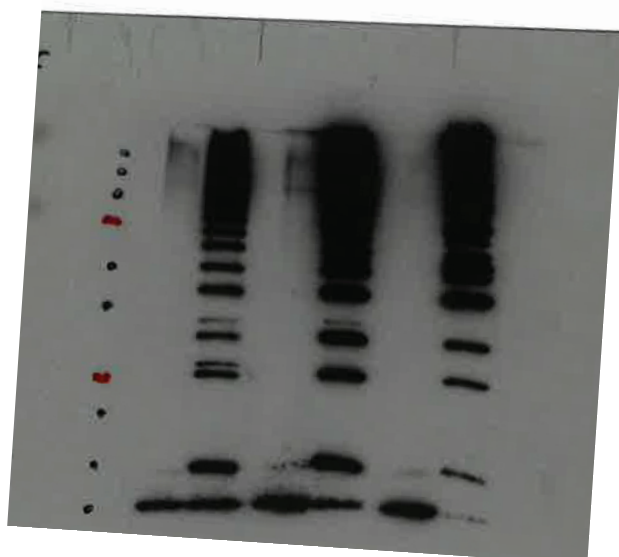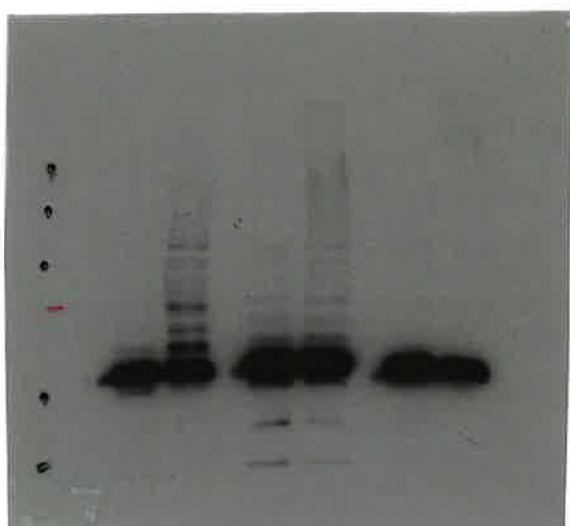

Supplement: supp [file elife-60660-supp-v1.zip]

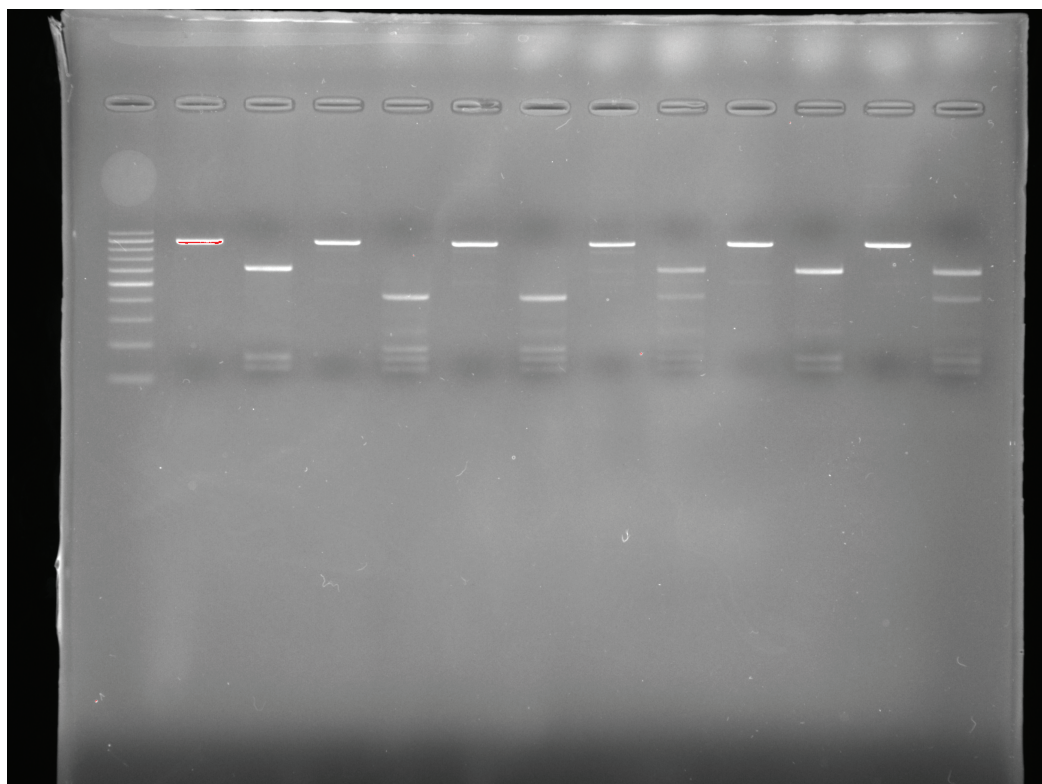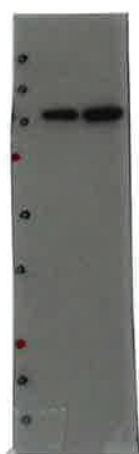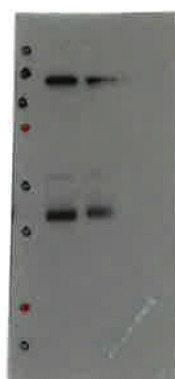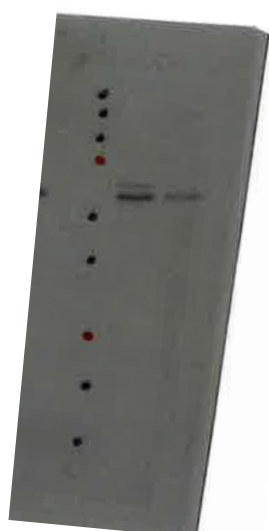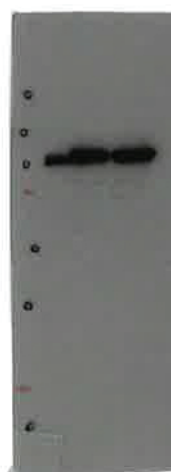

Supplement: supp [file elife-60660-supp-v1.zip]

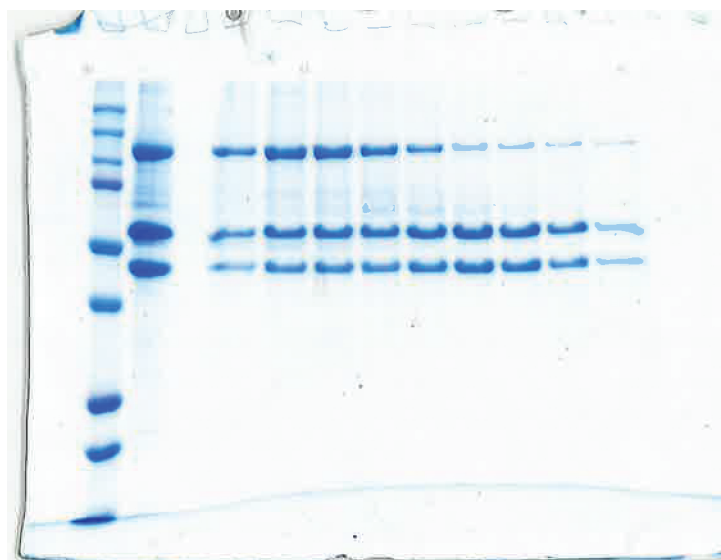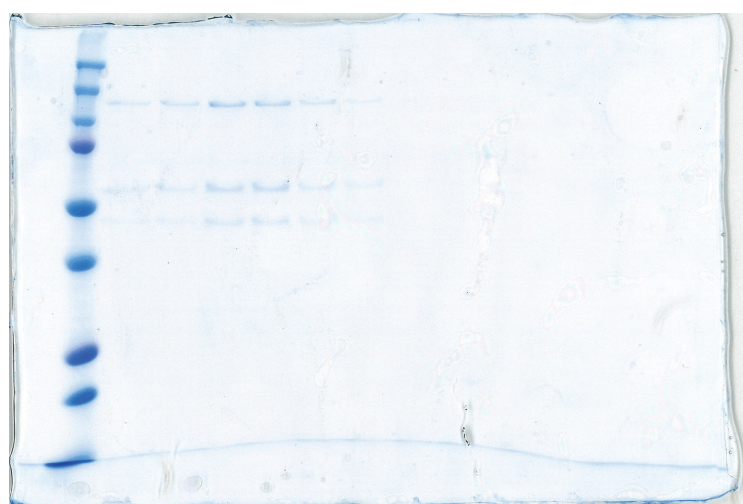

Supplement: supp [file elife-60660-supp-v1.zip]

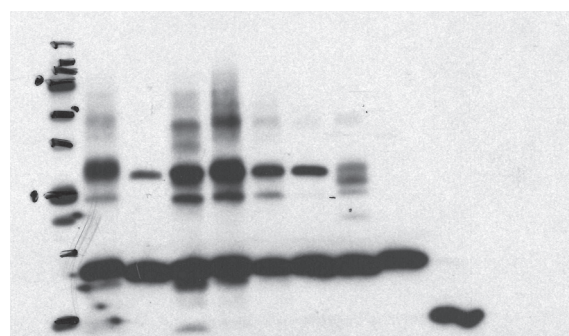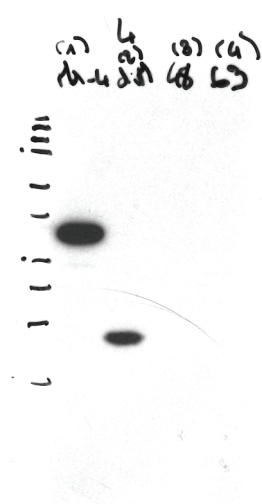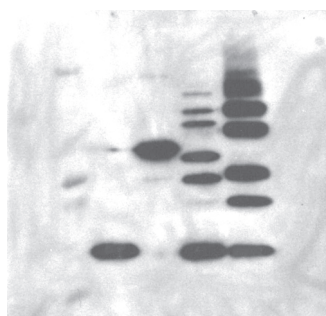

Supplement: supp [file elife-60660-supp-v1.zip]

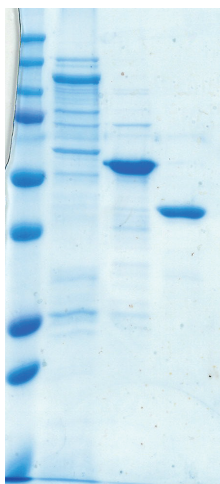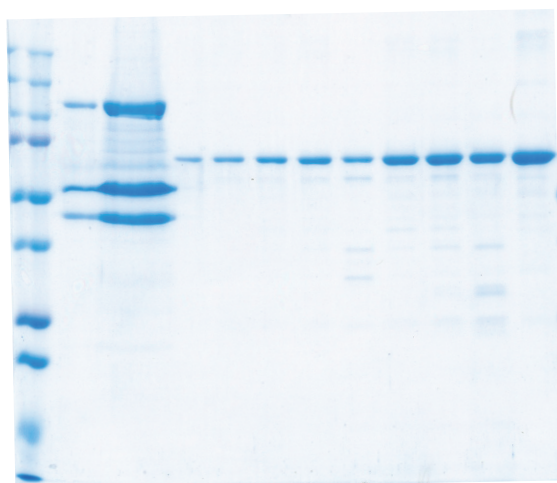

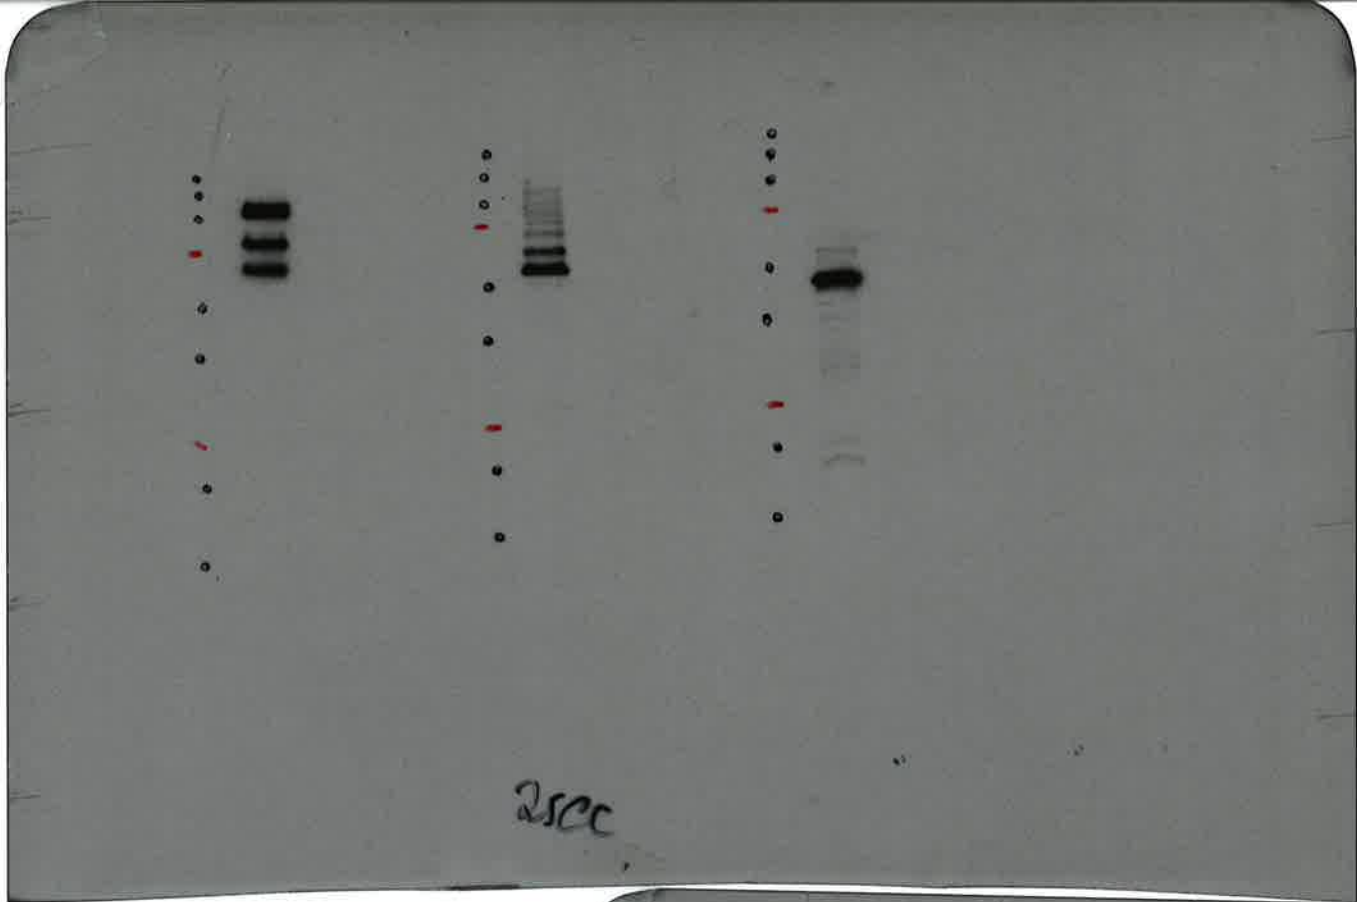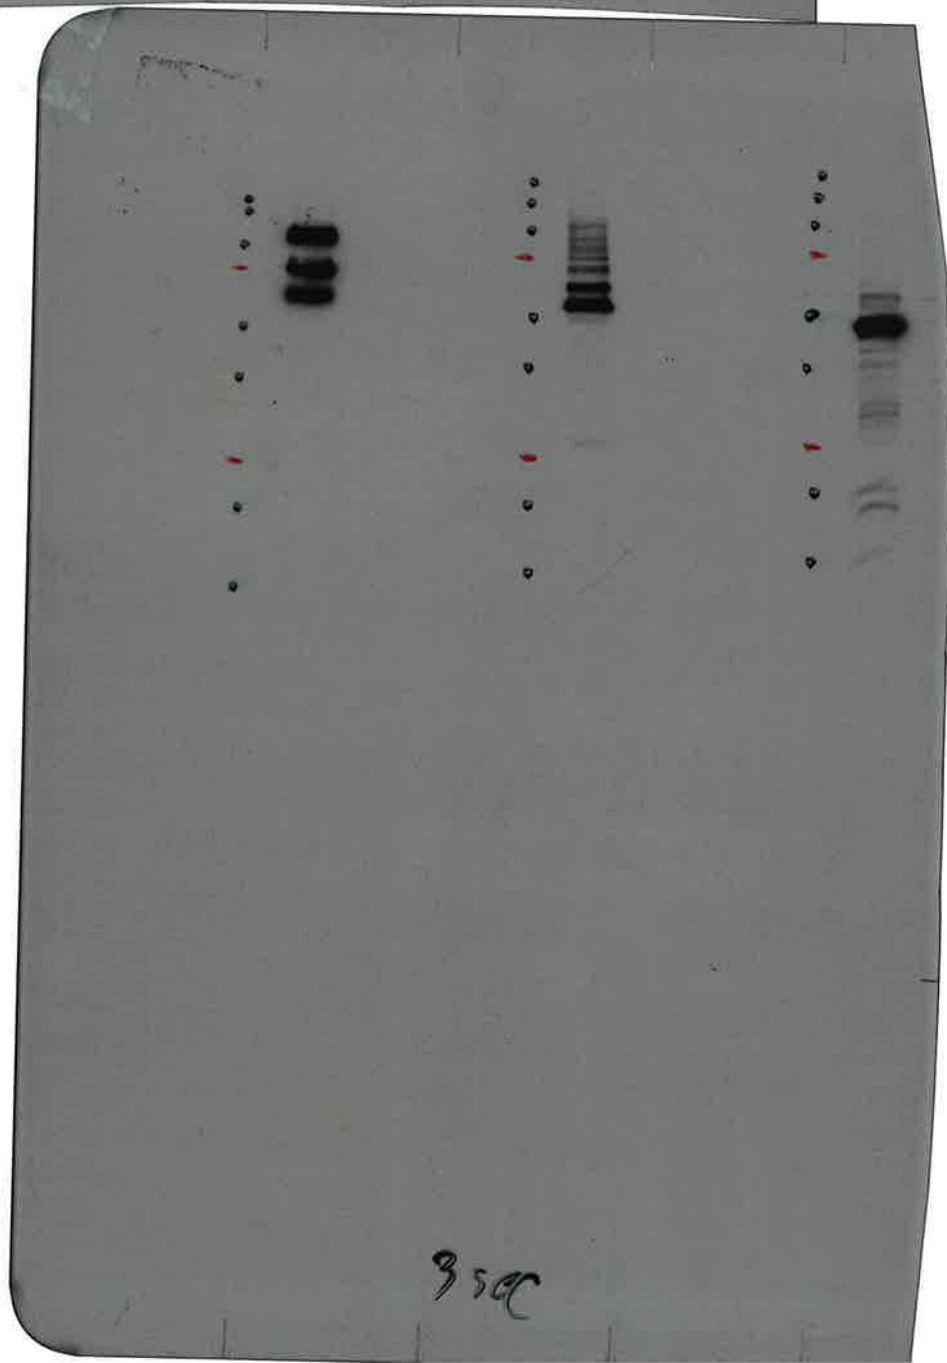

Supplement: supp [file elife-60660-supp-v1.zip]

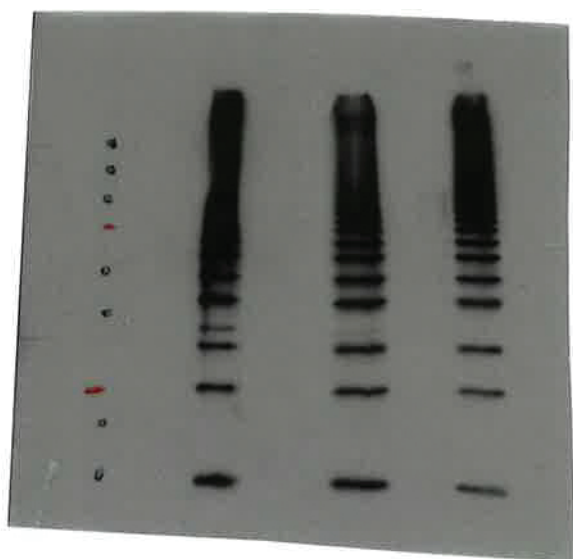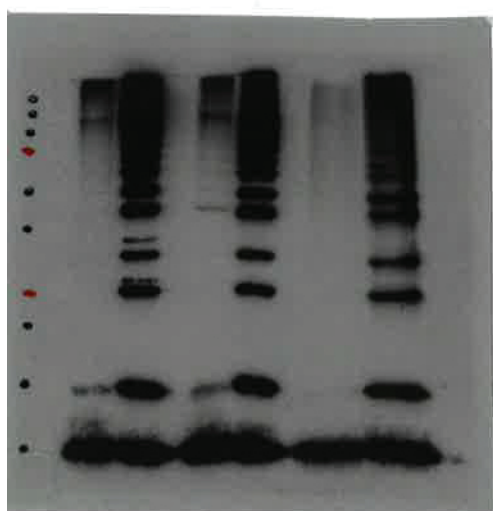

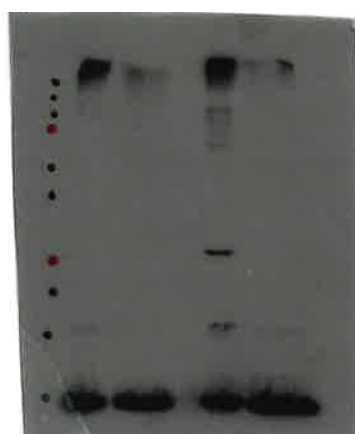

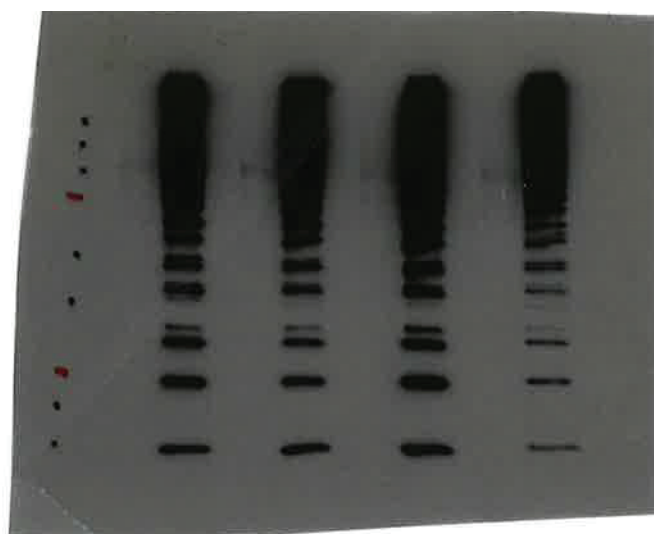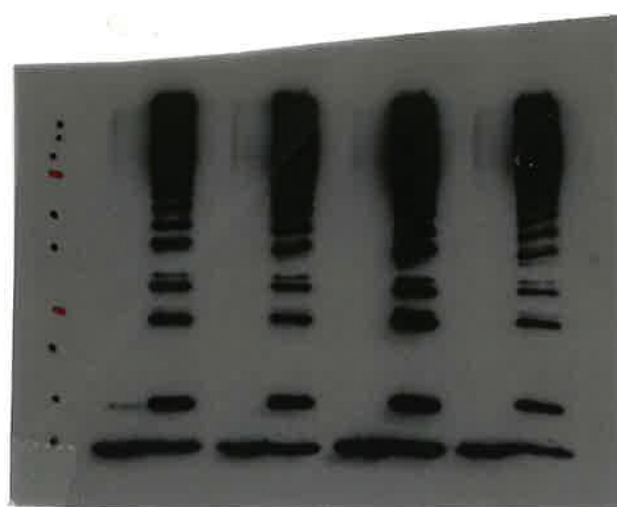

Supplement: supp [file elife-60660-supp-v1.zip]

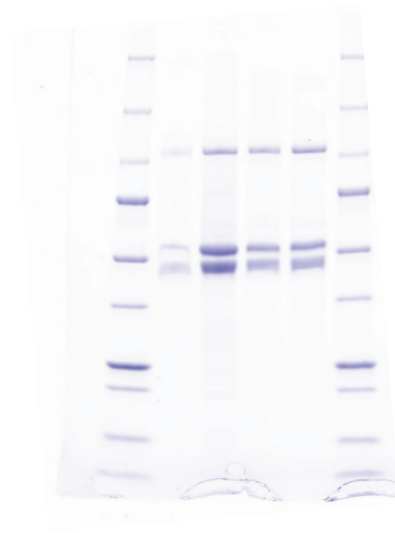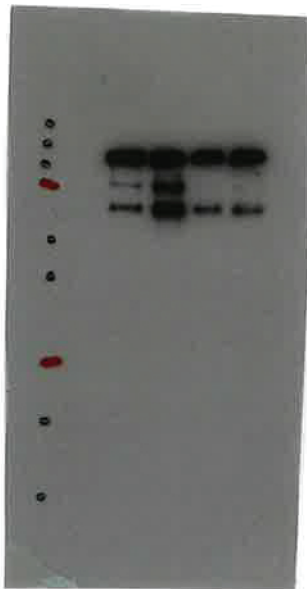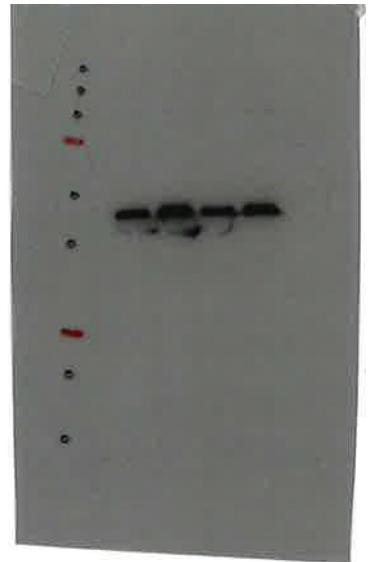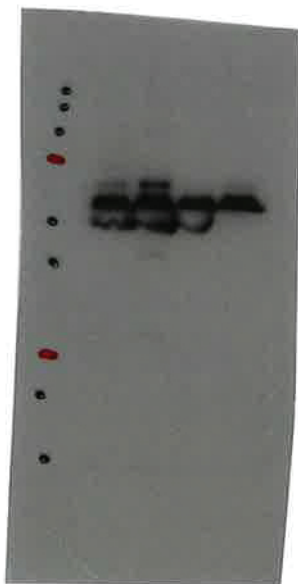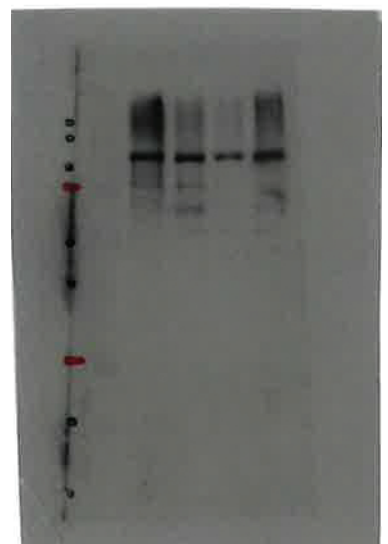

Supplement: supp [file elife-60660-supp-v1.zip]
